# Supplementary material for: A genome scan revealed significant associations of growth traits with a major QTL and GHR2 in tilapia
Source: PubMed Central journal article supplement — Sci Rep. 2014 Dec 1;4:7256. doi: 10.1038/srep07256 (PMC4248272; doi:10.1038/srep07256), 2014-12-01
Supplement: srep07256-s1.pdf [file srep07256-s1.pdf]

**A genome scan revealed significant associations of growth traits with a major QTL and GHR2 in tilapia**

Feng Liu<sup>1, §</sup>, Fei Sun<sup>1, §</sup>, Jun Hong Xia<sup>1</sup>, Jian Li<sup>1</sup>, Gui Hong Fu<sup>1</sup>, Grace Lin<sup>1</sup>, Rong Jian Tu<sup>1</sup>, Zi Yi Wan<sup>1</sup>, Delia Quek<sup>1</sup> and Gen Hua Yue<sup>1, 2, \*</sup>

1. Molecular Population Genetics Group, Temasek Life Sciences Laboratory, 1 Research Link, National University of Singapore, Singapore 117604, Republic of Singapore
2. Department of Biological Sciences, National University of Singapore, 14 Science Drive, Singapore 117543

§ These authors contributed equally to this work.

\* Corresponding author

Dr. Gen Hua Yue

Molecular Population Genetics Group, Temasek Life Sciences Laboratory, 1 Research Link, National University of Singapore, Singapore 117604, Republic of Singapore

Email: genhua@tll.org.sg

Phone: 65-68727405

Fax: 65-68727405

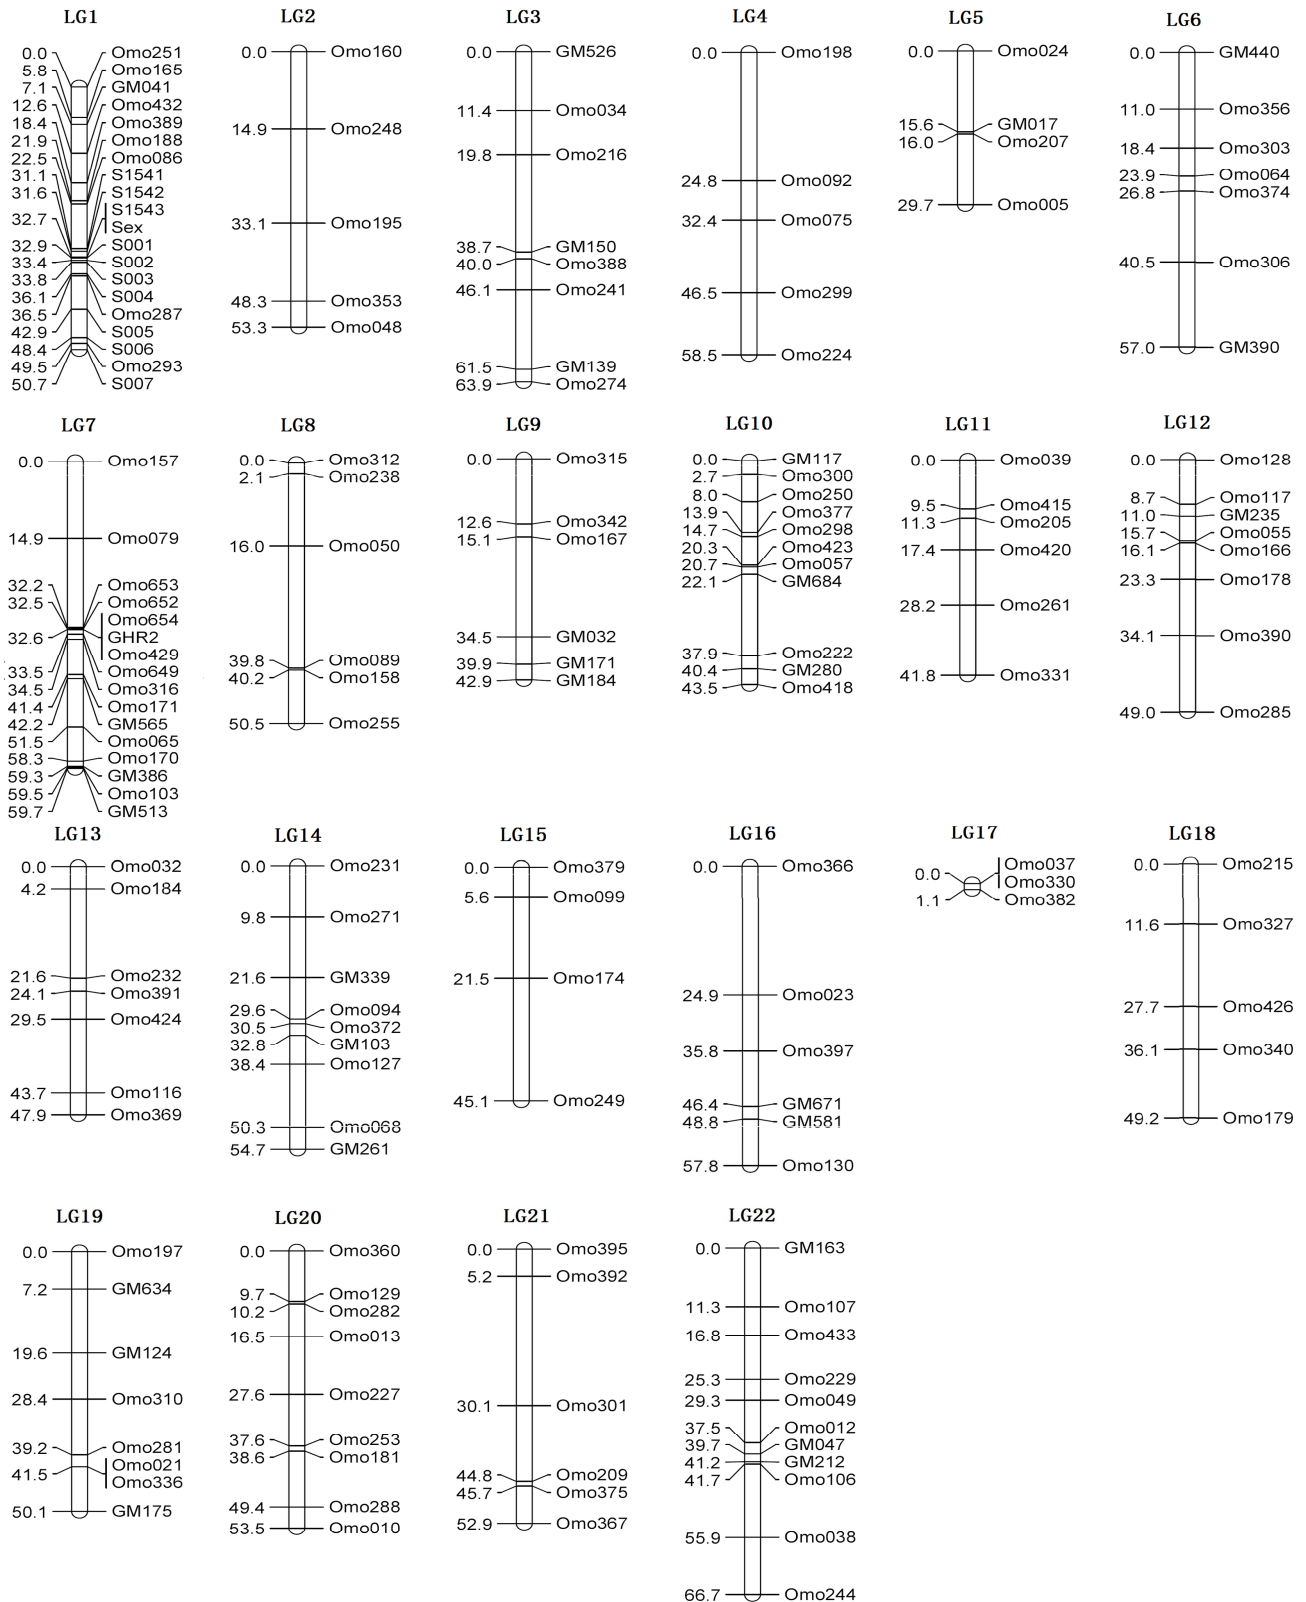

Figure S1. A linkage map of tilapia (*Oreochromis* spp.) based on reference family OmR1. The location of each marker is indicated on the left side of linkage groups in Kosambi centimorgans, and names of the markers are indicated on the right side of linkage groups.

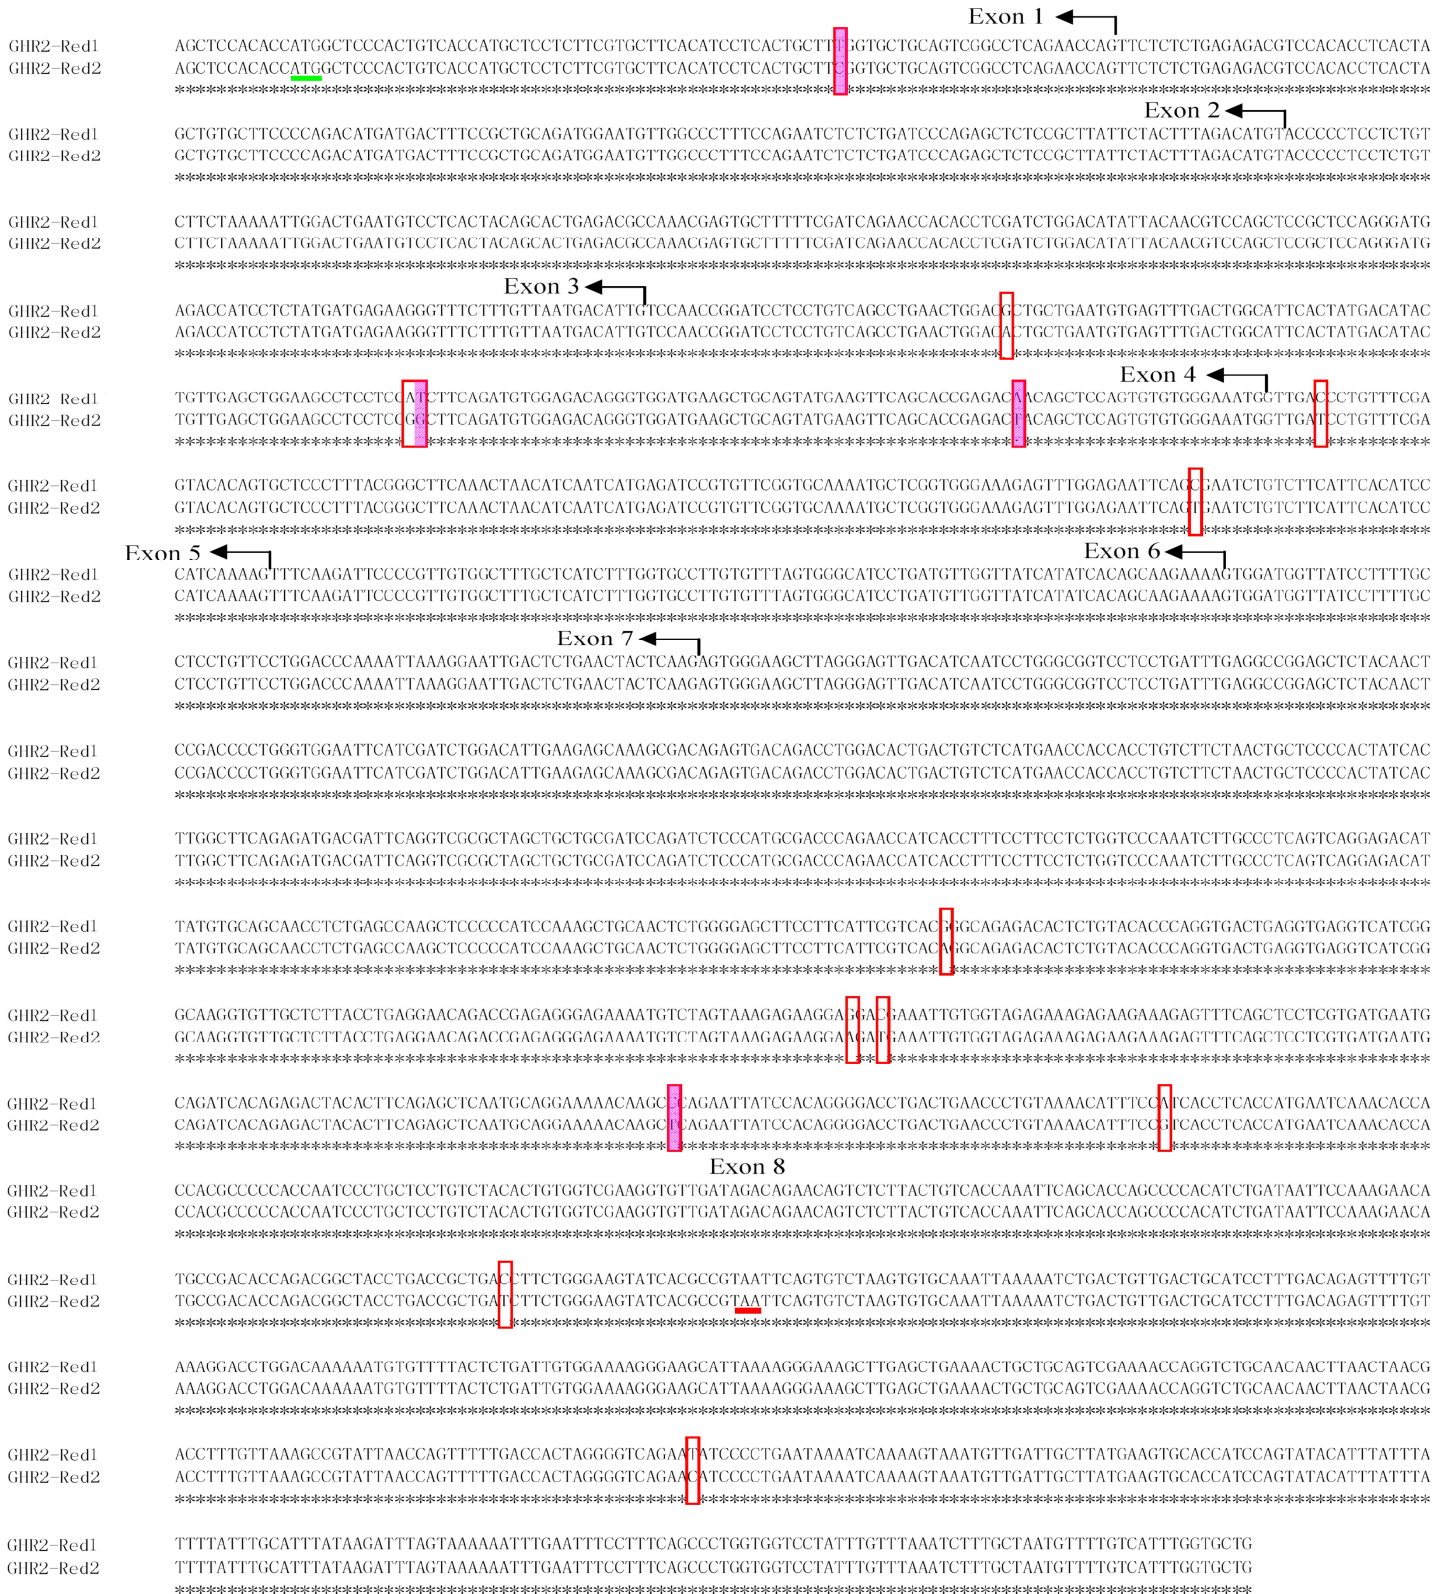

Figure S2. Alignment of cDNA between GHR2<sup>red1</sup> and GHR2<sup>red2</sup>

The green and red underlines indicate the start codon and the stop codon, respectively. The red boxes indicate the differences between GHR2<sup>red1</sup> and GHR2<sup>red2</sup>. The pink blocks indicate the nucleotide differences causing missense mutations.

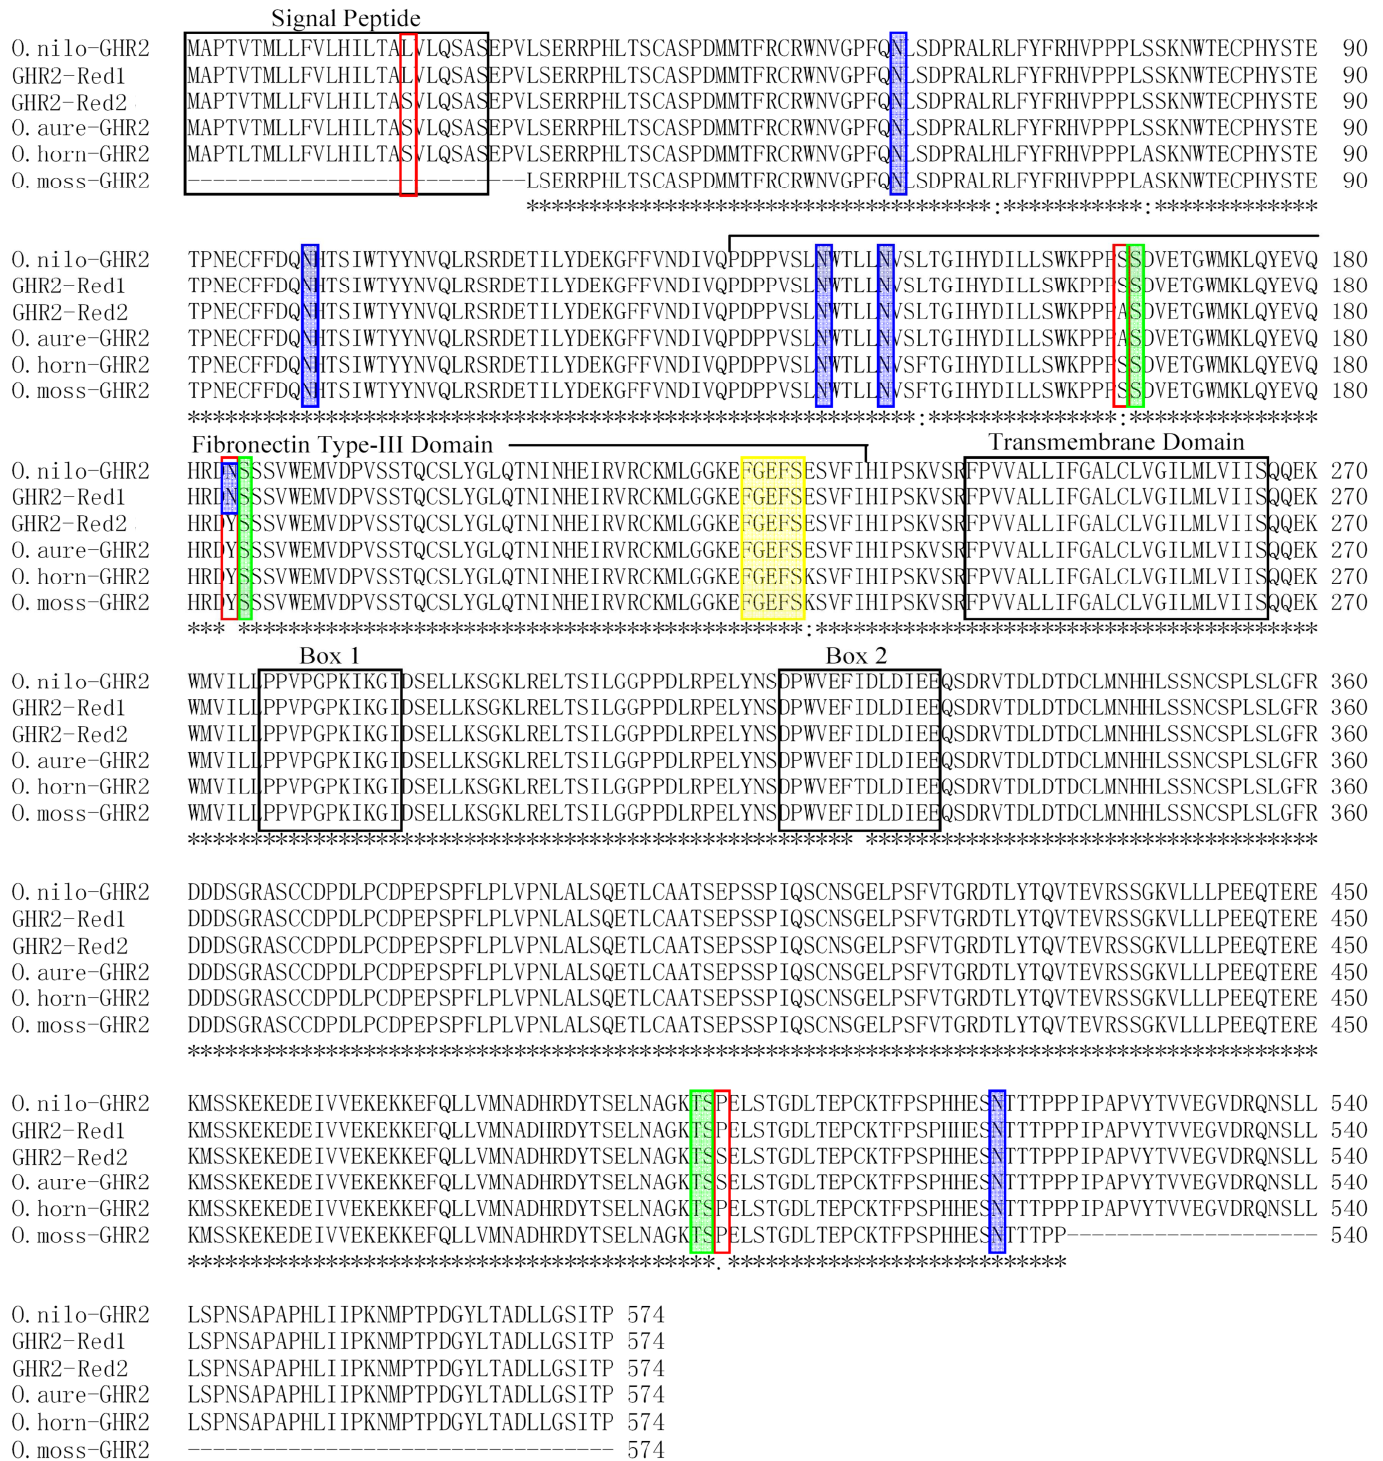

Figure S3. Alignment of GHR2s in different tilapia species

The blue, green and yellow blocks indicate the N-glycosylated sites, phosphorylation and “FGEFS” motif, respectively. The red boxes indicate the differences of GHR2 between Nile tilapia and blue tilapia. The GHR2 sequences are from *O. mossambicus* (EF452496), *O. aureus* (KJ845729), *O. niloticus* (NM\_001279455), *O. hornorum* (EF371467) and two alleles of red tilapia identified in this study (KJ845730, KJ845731).

Table S1 Genes predicted in QTL mbw-c

| Location in LG7   | GenBank Accession No. | Annotations                                                      |
|-------------------|-----------------------|------------------------------------------------------------------|
| 30484293-30487181 | XM_003440089          | Sjoegren syndrome nuclear autoantigen 1 homolog                  |
| 30525829-30528309 | XM_003440088          | transmembrane protein 203-like                                   |
| 30528566-30539060 | XM_003440087          | delta-aminolevulinic acid dehydratase-like                       |
| 30637905-30642465 | XM_003440086          | hypothetical protein                                             |
| 30657974-30658456 | XM_003440085          | pro-MCH-like                                                     |
| 30697875-30701731 | XM_003440084          | G2/mitotic-specific cyclin-B1-like                               |
| 30724707-30735774 | XM_003440215          | transmembrane channel-like protein 2-like                        |
| 30737985-30744044 | XM_003440078          | annexin A1-like                                                  |
| 30745448-30756091 | XM_003440077          | zinc transporter 5-like                                          |
| 30831164-30855206 | XM_003440212          | tight junction protein 2                                         |
| 30877919-30892123 | XM_003440211          | phosphatidylinositol-4-phosphate 5-kinase type-1 beta-like       |
| 31093184-31173736 | XM_003440076          | ephrin-A5b-like                                                  |
| 31277417-31278051 | XM_003440075          | growth arrest and DNA damage-inducible protein GADD45 gamma-like |
| 31282154-31282845 | XM_003440074          | growth arrest and DNA damage-inducible protein GADD45 gamma-like |
| 31300107-31327029 | NM_001279455          | growth hormone receptor II (GHR2)                                |
| 31340186-31350781 | XM_003440072          | complement component C6-like                                     |
| 31358181-31363191 | XM_003440071          | regulator of G-protein signaling 7-binding protein B-like        |
| 31365072-31367509 | XM_003440070          | E3 ubiquitin-protein ligase RNF180-like                          |
| 31482856-31485090 | XM_003440066          | hypothetical protein                                             |
| 31492181-31495804 | XM_003440065          | hypothetical protein                                             |
| 31584436-31589859 | XM_003440207          | hypothetical protein                                             |
| 31602497-31663545 | XM_003440064          | very low density lipoprotein receptor (VLDLR)                    |
| 31689361-31712577 | XM_003440204          | hypothetical protein                                             |
| 31721737-31723359 | XM_003440063          | tripartite motif-containing protein 16-like                      |
| 31744562-31746238 | XM_003440201          | E3 ubiquitin-protein ligase TRIM41-like                          |
| 31757342-31759039 | XM_003440200          | tripartite motif-containing protein 16-like                      |
| 31762567-31763484 | XM_003440062          | lys-63-specific deubiquitinase                                   |
| 31928588-32154070 | XM_003440197          | transcription factor 4-like                                      |
| 32303753-32311072 | XM_003440060          | thioredoxin-like protein 1-like                                  |
| 32313094-32321315 | XM_003440194          | hypothetical protein                                             |
| 32336913-32340064 | XR_134819             | hypothetical protein                                             |
| 32390621-32399281 | XM_003440059          | asparaginyl-tRNA synthetase                                      |
| 32402431-32421586 | XM_003440191          | ferrochelatase                                                   |

“Locations in LG7” represents the locations in LG7 of whole genome sequences of Nile tilapia Orenil1.1.

Table S2 Average body weight(g) of individuals with different GHR2 genotypes in four families

| <b>Genotypes</b> | <b>Sex</b> | <b>OmR1</b>  | <b>ROm1</b> | <b>ROm2</b> | <b>OmR2</b> |
|------------------|------------|--------------|-------------|-------------|-------------|
| Nile/Moza        | Male       | 170.21±27.22 | 61.56±12.87 | 75.63±10.68 | 76.1±9.91   |
| Blue/Moza        | Male       | 155.8±27.11  | 54.35±22.24 | 73.22±12.56 | 57.72±13.94 |
| Nile/Moza        | Female     | 82.65±24.97  | 60.91±12.28 | 56.84±9.33  | 47.24±15.31 |
| Blue/Moza        | Female     | 75.71±23.08  | 59.18±16.16 | 53.22±7.86  | 43.98±15.87 |

The family OmR1 was 140 dph and others were 90 dph.



Table S3 Primer information for microsatellite markers used in QTL mapping

| Marker name | Genbank No. | Linkage group | Primer sequence (forward) | Primer sequence (reverse) | Product length (bp) | Motif    | Annealing temperature | Application      |
|-------------|-------------|---------------|---------------------------|---------------------------|---------------------|----------|-----------------------|------------------|
| GM041       | BV005284.1  | 1             | TGGTGTTCAGCTACACGAGA      | CCAGGACCGATGTGAACTTT      | 245                 | (CA)27   | 55                    | 1st QTL analysis |
| Omo086      | JX204884    | 1             | AAACGCACGCACGCAAACA       | GGTGCCTCAAAGCCATACATCC    | 302                 | (CA)8    | 60                    | 1st QTL analysis |
| Omo165      | JX204926    | 1             | AAAGCGAGGATCAGCCAGAGTTAC  | TGACGGGGTGAACAAAATAAAAGA  | 287                 | (CA)10   | 60                    | 1st QTL analysis |
| Omo188      | JX204944    | 1             | ACATATTCGCCTTGTTCACCCAG   | GAAGTGTGCGTTCAAAGTATGATT  | 163                 | (CA)16   | 55                    | 1st QTL analysis |
| Omo251      | JX204990    | 1             | CTCGCCCAGTCCTTTCACATC     | GACCCAACATGTCTGCTGAACTAA  | 198                 | (CA)22   | 60                    | 1st QTL analysis |
| Omo287      | JX205012    | 1             | AACCTGGTTAGTCTCTGGCTGCTC  | ATGGCATGGTTTGCAACATAATCC  | 280                 | (GT)17   | 60                    | 1st QTL analysis |
| Omo293      | JX205016    | 1             | CTATCTGCCCCGTTTTCTTTGT    | ATGCCGCATTTTTAGTTCCATA    | 435                 | (GA)23   | 60                    | 1st QTL analysis |
| Omo389      | GR694351.1  | 1             | ACCACAATTCACCACCTCAGTCAG  | TAAAGGGGCGATATCGTTGTCTCT  | 265                 | (GA)7    | 60                    | 1st QTL analysis |
| Omo432      | GR691476.1  | 1             | AGTAGTTTTTGTTCATTAGAGACG  | TAGTCACACTGATAATTTTTCTTG  | 224                 | (ATAG)15 | 50                    | 1st QTL analysis |
| S1541       | KJ812102    | 1             | GGACAGATTCCATCCACCAGTAA   | TCAAGCACATACAAAGCCTACAA   | 283                 | (GT)12   | 55                    | Fine mapping     |
| S1542       | KJ812101    | 1             | TTGCATATTCCTCTATCCTCCTAA  | GATAGAAATACGCATGCAGAGTCC  | 355                 | (CA)15   | 55                    | Fine mapping     |
| S1543       | KJ812100    | 1             | ACCGCGCTCTCAGCCTTCAT      | TGAGCGTCAGCGTCTCCATC      | 406                 | (CA)18   | 55                    | Fine mapping     |
| S001        | KJ812093    | 1             | TCTGGTGCATAGACATTCAACTG   | TTTTCTCCCCAAATTCATAAAGT   | 323                 | (CA)16   | 55                    | Fine mapping     |
| S002        | KJ812094    | 1             | TTTCTCCCAGCTTGTGTAAGTCT   | TTGGACCTGGATTGCTGTTGATTA  | 384                 | (CA)22   | 55                    | Fine mapping     |
| S003        | KJ812095    | 1             | AGGCTGCAGAAAAGAGGGATACA   | GAGAGGCTGAGGGCGAACAGTG    | 405                 | (GT)16   | 55                    | Fine mapping     |
| S004        | KJ812096    | 1             | ATAAGCCACAAGAACACAGTTGC   | CAGGGGGAAGATCCTAAAGAGATT  | 464                 | (GT)14   | 55                    | Fine mapping     |
| S005        | KJ812097    | 1             | ACGTAGAGCCAGAAACCAAACCTA  | CAGAGCCGAAGTATGCGTAAAG    | 208                 | (CA)14   | 55                    | Fine mapping     |
| S006        | KJ812098    | 1             | TGATCTTGGACTATATGGACTGC   | GTGGCTTTGAGACTTGTGTATGGT  | 199                 | (CA)14   | 55                    | Fine mapping     |
| S007        | KJ812099    | 1             | TGTTCCGACTTTAAAGGGAGAGGT  | TGCATACACGCACAAAGGAATG    | 236                 | (GT)16   | 55                    | Fine mapping     |
| Omo048      | JX204859    | 2             | TCCCCACACCTCCTGCTCCTC     | AGCCCAAGCCAGTCCCATAGC     | 336                 | (CA)18   | 60                    | 1st QTL analysis |
| Omo160      | JX204923    | 2             | AGGATTCCTGAAAGTGTTTTT     | ACTCTACGTGACCTCTGACAATAG  | 210                 | (GT)10   | 55                    | 1st QTL analysis |
| Omo195      | JX204950    | 2             | TTCACAAAGCCCTGGAGAGGAGAG  | CAGCCCCAGTGGACATAAGAAAC   | 469                 | (GT)15   | 60                    | 1st QTL analysis |
| Omo248      | JX204987    | 2             | AAAGACACAAAGAGAACTAATCA   | GGATGAATATTTAAATCAGTCAG   | 381                 | (TCA)9   | 55                    | 1st QTL analysis |
| Omo353      | JX205063    | 2             | GGGCTAGTCACAGATGCGTTCAAG  | GACCGAAGGTGCCGTTTCTAACA   | 437                 | (GT)15   | 60                    | 1st QTL analysis |
| GM139       | BV005327.1  | 3             | TTTGTAGTAACCACCCTAACAC    | GTGGGATCTACCAAGAAGAG      | 255                 | (GT)17   | 55                    | 1st QTL analysis |
| GM150       | BV005333.1  | 3             | AGGTGATTGGCTTAGATGAT      | GTCTCAGTTTGTGGCTTA        | 177                 | (CA)30   | 55                    | 1st QTL analysis |
| GM526       | BV005475.1  | 3             | CAACTGTTGGCAGTGACAGG      | TCTTCTCAGCCCATCTGTT       | 266                 | (CA)8    | 55                    | 1st QTL analysis |
| Omo034      | GR700139.1  | 3             | CAGGGTTAGTAGCAGAAAGTGG    | CTGATTGCTCACCAGCTTTAC     | 155                 | (CA)9    | 60                    | 1st QTL analysis |
| Omo216      | JX204961    | 3             | CGCCAGCAGAGGGCTAAGGAG     | AAGCAGAGTTCAGCCTCGCAGACT  | 418                 | (GT)16   | 55                    | 1st QTL analysis |
| Omo241      | JX204982    | 3             | AGAGTACGACCCTGCACACTTCAC  | TGATCAACAATCTGGCTTATTCTG  | 219                 | (CA)23   | 50                    | 1st QTL analysis |
| Omo274      | JX205003    | 3             | TCAGCTGGATCTGCTCAGTGTGAC  | ACAGAACGCAGTGCTTTCATTTTG  | 401                 | (CA)9    | 60                    | 1st QTL analysis |
| Omo388      | GR694421.1  | 3             | GGGATTTGTTTTCTCCTTAGCA    | CAGCCATTGTTGTGTATTTGTGAC  | 143                 | (GT)7    | 55                    | 1st QTL analysis |
| Omo075      | JX204879    | 4             | CGGCTCGGCCTCCTCATCT       | TAGGCACAAAGTGGGTGGAAGGT   | 464                 | (CA)13   | 55                    | 1st QTL analysis |
| Omo092      | JX204890    | 4             | GCACGCTGAACTTACACAGTGA    | GAGGCTTAGTTGGGCTGATTGATT  | 185                 | (CT)12   | 60                    | 1st QTL analysis |
| Omo198      | JX204952    | 4             | TGTCTCATCTCCGTTAACTGTTTG  | AGACTAGAGGAACCCGACACAATA  | 302                 | (GT)9    | 55                    | 1st QTL analysis |

Table S3 Primer information for microsatellite markers used in QTL mapping (Continued)

| Marker name | Genbank No. | Linkage group | Primer sequence (forward) | Primer sequence (reverse) | Product length (bp) | Motif      | Annealing temperature | Application      |
|-------------|-------------|---------------|---------------------------|---------------------------|---------------------|------------|-----------------------|------------------|
| Omo224      | JX204968    | 4             | TTCCCGGAGTACAGAATGTTAGAC  | GAGGCTGCATTAGCTAGTGGATAC  | 260                 | (GT)13     | 55                    | 1st QTL analysis |
| Omo299      | JX205021    | 4             | GTTGGACAACATCGCCTACATCAT  | CACGCAATTAACGTCCTCACTGAA  | 365                 | (GT)10     | 60                    | 1st QTL analysis |
| GM017       | BV005269.1  | 5             | GATACCTGTCCATACCTCCTC     | CCCTCTGTTTCCATCTCA        | 160                 | (CA)26     | 55                    | 1st QTL analysis |
| Omo005      | GR704204.1  | 5             | TTGGGGGAATTTTGGGGTCTG     | AAGCCCTGGAAAAAGCAACCTCT   | 255                 | (CA)10     | 55                    | 1st QTL analysis |
| Omo024      | JX204850    | 5             | AGTTTCTGCTGCTATTCATTAC    | GGCTCAAGATACCCATACAA      | 403                 | (CA)27     | 60                    | 1st QTL analysis |
| Omo207      | JX204956    | 5             | GAGGGGTGGCTCAAGACTTTT     | ACTGCTGGGTAAACACCATACTTT  | 153                 | (CA)25     | 55                    | 1st QTL analysis |
| GM390       | BV005377.1  | 6             | ACAGAGCCCTGTGGGAAAAGT     | TCTGTAGCAGCGGCATTAC       | 211                 | (CA)30     | 55                    | 1st QTL analysis |
| GM440       | BV005452.1  | 6             | CTGCACTTTTACTGAGGG        | TGGGAGATTAACAGAATAAC      | 264                 | (CA)21     | 55                    | 1st QTL analysis |
| Omo064      | JX204871    | 6             | CTTCCCCTCTGTCTCCACTGTCTG  | CCAAAAGCCCGTCAGCGTAAT     | 300                 | (CT)18     | 55                    | 1st QTL analysis |
| Omo303      | JX205025    | 6             | CTCACCCGAGCAGGCAGGAG      | GCTGATGTTCTGGGGGATAATGG   | 181                 | (CAG)7(CA) | 55                    | 1st QTL analysis |
| Omo306      | JX205028    | 6             | AATGCGAAGGCGAGTGGAGTG     | AGCAGGTGATTAGGAGAGGCTGAT  | 182                 | (GT)10     | 60                    | 1st QTL analysis |
| Omo356      | JX205066    | 6             | CAGTCTGCCTGTCTGAAAAGTGT   | AAGCCTTCTTGCTCAGTGACCTA   | 467                 | (CA)14     | 60                    | 1st QTL analysis |
| Omo374      | JX205080    | 6             | GTAAGCGCAATGATATGAATGAAT  | TTGCCAAGATATTAGAACCAGATG  | 409                 | (CA)12     | 60                    | 1st QTL analysis |
| GM386       | BV005435.1  | 7             | CCTAACAAGCGTCTTTTCAGC     | TGGCAAACAGTCAGTCAGTG      | 120                 | (CA)18     | 55                    | 1st QTL analysis |
| GM513       | BV005467.1  | 7             | TTGGAATTGGTCATCCAACA      | ATTACACTTCTGCCACCA        | 171                 | (CA)17     | 55                    | 1st QTL analysis |
| GM565       | BV005501.1  | 7             | AGCCTCTGTGTTTCAGCTTGG     | GGTTGGATGCCTATGATGTG      | 166                 | (CA)9      | 55                    | 1st QTL analysis |
| Omo065      | JX204872    | 7             | AACGGTTTAACAGTCACGCACATC  | TGCTTACTCGCCATTGACATTCTT  | 240                 | (GT)9      | 60                    | 1st QTL analysis |
| Omo079      | JX204880    | 7             | TCACAGCTGTGCAGATTTCTCACG  | TGGCTGTAGCAAATATGATACCAA  | 423                 | (CA)19     | 60                    | 1st QTL analysis |
| Omo103      | JX204898    | 7             | CTGGGTCGGCATCACAGAACTT    | GAGCCCATCCCTGATCGCTATTA   | 371                 | (CA)11     | 60                    | 1st QTL analysis |
| Omo157      | JX204920    | 7             | TAAGGCGGCTGTCATTTGTGATTA  | GCTGCTCTGTCATGCCTCTTCA    | 195                 | (GT)14     | 55                    | 1st QTL analysis |
| Omo170      | JX204929    | 7             | AGGGCAGCACTCTTTCACAGATTT  | AGGAGCAGGCCGAAAGGACAAT    | 237                 | (GT)10     | 55                    | 1st QTL analysis |
| Omo171      | JX204930    | 7             | AGCCTCGGGAAGAGTGAAGTCAAC  | TTTTTGCTAACCCATCTCCTGTGA  | 153                 | (CT)9      | 55                    | 1st QTL analysis |
| Omo316      | JX205037    | 7             | GGGGATTCAATAAGAGCTGCTTCT  | ATAGGAGTTTAAGGTCAGGCTTCA  | 287                 | (GT)12     | 60                    | 1st QTL analysis |
| Omo429      | GR685641.1  | 7             | GCTGTGAGGTTTCTTTTTCGTGAC  | CTGGGCCTTAGCTGTCCACTGTA   | 378                 | (GT)12     | 55                    | 1st QTL analysis |
| Omo653      | KJ871683    | 7             | CAGCATACGTTTAGGGGTCAACAC  | CAAAGGCAATCATGAAAATGTCTC  | 413                 | (GT)17     | 55                    | Fine mapping     |
| Omo652      | KJ871682    | 7             | CAGAAGTGATGGGTGGGTGAAGC   | CTGCCAAGCCAAGTGGTCGTC     | 275                 | (GT)17     | 55                    | Fine mapping     |
| Omo649      | KJ871681    | 7             | TGTGTCCGTGTGACCAAATAACT   | ACCCGTTGTGTAATGCAGTGATAA  | 263                 | (AC)18     | 55                    | Fine mapping     |
| Omo654      | KJ871684    | 7             | ACAACCTGCAGCCGAAGTAAAATC  | AGAACATCACCCCCTCCCTTCAA   | 333                 | (GT)19     | 55                    | Fine mapping     |
| Omo050      | JX204861    | 8             | GCTTTCGCCCCCTTCTTCTT      | TCATTCCCTCTGATTACGAGTGTG  | 410                 | (TGA)13    | 60                    | 1st QTL analysis |
| Omo089      | JX204887    | 8             | CTCCCGCCCCCTCAAGTGTCT     | TCCATTGGCCTCAAAGTAAGAACA  | 234                 | (GT)10     | 60                    | 1st QTL analysis |
| Omo158      | JX204921    | 8             | CTTGCAGACGGTTCATTTACAGAG  | TCCGGTTAATCGCTCTCACTCTCA  | 425                 | (GT)18     | 55                    | 1st QTL analysis |
| Omo238      | JX204981    | 8             | ATATTACGTCCAAACATCCAGAGC  | GAGCCAAAGGCAGAAGTAAACAGT  | 208                 | (CT)11     | 55                    | 1st QTL analysis |
| Omo255      | JX204992    | 8             | GAGTTTTGAGCCAGCATGATTTCA  | AAAAGGGGACAGGTCCTGGATTC   | 356                 | (AT)7      | 60                    | 1st QTL analysis |
| Omo312      | JX205034    | 8             | ATAGTTTGGCAGGTCATTTTCAGA  | GGGGTAGTTTTGTTGTGCTTTTT   | 345                 | (GT)30     | 55                    | 1st QTL analysis |
| GM032       | BV005279.1  | 9             | TTTCGACAAGAAGGCGTTGA      | CGCAGAGATTTTGGCTCATT      | 244                 | (CA)15     | 55                    | 1st QTL analysis |



Table S3 Primer information for microsatellite markers used in QTL mapping (Continued)

| Marker name | Genbank No. | Linkage group | Primer sequence (forward) | Primer sequence (reverse) | Product length (bp) | Motif    | Annealing temperature | Application      |
|-------------|-------------|---------------|---------------------------|---------------------------|---------------------|----------|-----------------------|------------------|
| GM171       | BV005343.1  | 9             | GAGTTAGGGCAGAGGTTATGT     | GCCATCACCTCTTGCTT         | 280                 | (CA)22   | 55                    | 1st QTL analysis |
| GM184       | BV005348.1  | 9             | GGAGAACAGGGCTTATTG        | CACTTCCACCTTTACTTTGA      | 209                 | (CA)22   | 55                    | 1st QTL analysis |
| Omo167      | JX204928    | 9             | TCACGGACACTGAACAAAGAGGA   | TGGCCATGGAGATTTAAAGAACAC  | 393                 | (CA)23   | 60                    | 1st QTL analysis |
| Omo315      | JX205036    | 9             | TGCTCGCGTGTGGATAAACTACTA  | GACCGTGTTATTGTGCAAAAGTGA  | 400                 | (GT)13   | 60                    | 1st QTL analysis |
| Omo342      | JX205055    | 9             | TCGGTTAACGGTGGTTTCTTTGTG  | GGTGAGAGTAACAGGGGGCTGAAT  | 382                 | (TA)8    | 60                    | 1st QTL analysis |
| GM117       | BV005316.1  | 10            | CCTCCCTCCGCTTACCAC        | GTCCCTCACATGAAAGCAGA      | 273                 | (CA)27   | 55                    | 1st QTL analysis |
| GM280       | BV005392.1  | 10            | GTTAATAGGGGTGGGTGAA       | AAACCGCAACCTCTTCTTTT      | 159                 | (CA)24   | 55                    | 1st QTL analysis |
| GM684       | BV005558.1  | 10            | TGGGTGACCAAACTGACAAA      | ACTTATGGCGCGTGTGAGAT      | 201                 | (CA)23   | 55                    | 1st QTL analysis |
| Omo057      | JX204867    | 10            | ATTGGCGACACTCTGGTTTATCTG  | AAGCCATCATTTTCAGGACCAACTA | 123                 | (CA)7    | 60                    | 1st QTL analysis |
| Omo222      | JX204966    | 10            | AAGCGATAACGGAGATTCTTCTGA  | TAAAGGGTGCCGGTAAATGTAAAT  | 178                 | (GT)9    | 55                    | 1st QTL analysis |
| Omo250      | JX204989    | 10            | TCCGGCTGCTCCAGTGTGC       | GGCTGACGGAAAATGGCTCAT     | 428                 | (GT)15   | 60                    | 1st QTL analysis |
| Omo298      | JX205020    | 10            | GTGCCTGTCTTTAACCTCTGTGT   | CTATTATGCCTTTTGGGTTCTTCC  | 248                 | (AT)9    | 60                    | 1st QTL analysis |
| Omo300      | JX205022    | 10            | TTTGCACCCTGTACTCTCACTGTA  | ATATCGGGTAACATTCGCTCCACT  | 399                 | (CA)17   | 60                    | 1st QTL analysis |
| Omo377      | JX205083    | 10            | CTGACCCAGTGCACCATCTT      | TGAATTTAGAGGCTGTTTTGACAT  | 304                 | (CA)12   | 60                    | 1st QTL analysis |
| Omo418      | GR692221.1  | 10            | TGCTGCTTATCTGAATCTGGTGTT  | GGTCCCATTTATGTGACTGAGGTG  | 333                 | (GT)9    | 55                    | 1st QTL analysis |
| Omo423      | GR691841.1  | 10            | AACCTCAAGAGGGGGCAAGAATA   | CACCGCAATCCTATAATCCAGACC  | 331                 | (CA)11   | 60                    | 1st QTL analysis |
| Omo039      | JX204854    | 11            | CTGGCTGCCTCAGGACTCATCA    | GCACGGCCCGCAGGTAAATG      | 327                 | (ATT)8   | 60                    | 1st QTL analysis |
| Omo205      | JX204955    | 11            | GAGAGGGAGGGATGCTTGTT      | TTTGAAATCCACATTACATCTT    | 269                 | (GT)11   | 55                    | 1st QTL analysis |
| Omo261      | JX204994    | 11            | GCACCGATTAGTTTGCTTCATT    | CAACTGCTTTGGGGTTTATTTTAC  | 107                 | (CT)24   | 60                    | 1st QTL analysis |
| Omo331      | JX205048    | 11            | CCGCCACGCAGCTCATTATT      | CGAAGGCATCGGAGTATTCTACAT  | 451                 | (AC)11   | 60                    | 1st QTL analysis |
| Omo415      | GR692489.1  | 11            | AGCGGCAATAGCAGCAAAGGAC    | GACCCACTGGCATTAAATCAACAGC | 202                 | (GT)15   | 60                    | 1st QTL analysis |
| Omo420      | GR692153.1  | 11            | TCCATTAAGTTTGCAGGGCTTGTT  | CCGTGGGTTTGGTTTCCTCTC     | 331                 | (AGAT)15 | 55                    | 1st QTL analysis |
| GM235       | BV005372.1  | 12            | CACAGCGTGTCACTACT         | TGCCCTTTGTATTGTTTATT      | 158                 | (CA)26   | 55                    | 1st QTL analysis |
| Omo055      | JX204865    | 12            | TCCTCGTCATCATCCTCGTCAAAC  | CACGGCCCCCTCCTCAGTC       | 234                 | (AAG)7   | 60                    | 1st QTL analysis |
| Omo117      | JX204908    | 12            | GGGCTATTTTTACTGCTTTTTAG   | ACAGCTCATCAGTATCAGAGACTC  | 237                 | (GT)8    | 55                    | 1st QTL analysis |
| Omo128      | JX204913    | 12            | TCGCTGCGGCCTTCCATC        | AGCGCCTCCTTAACACCTCCTTC   | 366                 | (GT)9    | 60                    | 1st QTL analysis |
| Omo166      | JX204927    | 12            | CACCTCATCGGGAGACAGACAAG   | TGATGGCCACTAACTCGTGAAAAA  | 307                 | (CA)15   | 60                    | 1st QTL analysis |
| Omo178      | JX204936    | 12            | TCCGACACCTCCGCTGTAATACTA  | GCAGGCTTCCAGGTCTACTGATGT  | 440                 | (GA)13   | 55                    | 1st QTL analysis |
| Omo285      | JX205011    | 12            | GACAATCACTCCTCCAGCCTTACC  | CAGACGCTCAACTCACAGGAAAAA  | 285                 | (CA)10   | 60                    | 1st QTL analysis |
| Omo390      | GR697093.1  | 12            | CGCAGGGTTAATCGCACTGTCAT   | ATTTGTTTGAGGATCGCCGTCAT   | 288                 | (TA)7    | 60                    | 1st QTL analysis |
| Omo032      | GR695143.1  | 13            | GGTAAGCGGTGCAAAGTTCA      | GTTGGCTAACCTCTGTTCACTCC   | 313                 | (GAAAA)1 | 55                    | 1st QTL analysis |
| Omo116      | JX204907    | 13            | TGAAAATCAGCAGCACTTCGTT    | TTGGGGTATTTTATGTTGGCATCT  | 365                 | (CA)9    | 60                    | 1st QTL analysis |
| Omo184      | JX204942    | 13            | GGGGGCATGATTTACTTCTGAGGT  | AAGGCTGGAGCACAGGGACTTT    | 182                 | (CA)12   | 60                    | 1st QTL analysis |
| Omo232      | JX204976    | 13            | CATGAGCAAACAACAACAGTGAA   | GAGGCAAAGGAAGCAAGGTGAAG   | 470                 | (GAAA)9  | 60                    | 1st QTL analysis |
| Omo369      | JX205076    | 13            | GAGTCCCAGGACCTCTCAACC     | TCATAGTGCAGCCCAATAGTGTC   | 466                 | (CA)9    | 60                    | 1st QTL analysis |

Table S3 Primer information for microsatellite markers used in QTL mapping (Continued)

| Marker name | Genbank No. | Linkage group | Primer sequence (forward) | Primer sequence (reverse) | Product length (bp) | Motif    | Annealing temperature | Application      |
|-------------|-------------|---------------|---------------------------|---------------------------|---------------------|----------|-----------------------|------------------|
| Omo391      | GR699257.1  | 13            | AGACATCTGTACGCTCTTTACGAA  | AGTGCTAGAGGGAAGGGGCTGTA   | 290                 | (GAT)9   | 60                    | 1st QTL analysis |
| Omo424      | GR687536.1  | 13            | GTCGGCTGATGGGTGTAGTGAG    | AAAGGCCGTGGGGAGGTGAG      | 146                 | (CA)13   | 60                    | 1st QTL analysis |
| GM103       | BV005308.1  | 14            | CCACCAATATAGAGTTTAGCC     | CCCAGAGCTTTCATTACC        | 255                 | (GT)14   | 55                    | 1st QTL analysis |
| GM261       | BV005381.1  | 14            | GCTGTAGTTACCACGAGGTGA     | GTTTGGCAGCGTGTGTCAG       | 131                 | (GT)33   | 55                    | 1st QTL analysis |
| GM339       | BV005412.1  | 14            | CTCTCCAAATACGCCCTTATG     | GCCTCAGCCTCACCTCTT        | 131                 | (CA)40   | 55                    | 1st QTL analysis |
| Omo068      | JX204874    | 14            | TGGGATTTTGGCACTGGGACAT    | AAGCCGTTTGGGTGCATAGTGAG   | 429                 | (AT)8    | 55                    | 1st QTL analysis |
| Omo094      | JX204892    | 14            | TTCCGCTTATTATAGGTGCTGTA   | CTGCCGAGCGGTAGTGTTGG      | 447                 | (CA)10   | 60                    | 1st QTL analysis |
| Omo127      | JX204912    | 14            | ATTTGGGTCATGAATTGGGTTTG   | TGGACTGTTGCCCTTTAAGTGTTT  | 359                 | (GT)15   | 60                    | 1st QTL analysis |
| Omo231      | JX204975    | 14            | GTCTAGCGTTAGCGGTCTGTCTCT  | TGTATCAGCGAATAATCCACCTCA  | 257                 | (GT)11   | 60                    | 1st QTL analysis |
| Omo271      | JX205001    | 14            | GATCCAGGTATCTCCAGAGTCAT   | CCAGCCCTCACTGATATCTATTGT  | 191                 | (CA)21   | 60                    | 1st QTL analysis |
| Omo372      | JX205078    | 14            | ATGGGATATTTTTGTCAATGAAGA  | CAAGTGGCGTTAAGGTGTCAGTAG  | 304                 | (AT)9    | 60                    | 1st QTL analysis |
| Omo099      | JX204894    | 15            | TTCCAGAATGGCAACAATAATGTA  | AATAAATGTGTTCCGCGACTGTAAT | 234                 | (GT)15   | 60                    | 1st QTL analysis |
| Omo174      | JX204933    | 15            | TTCGCTTAAACGTGGTGCTTATTC  | TGCTGGTTTTTACAATGCCTGACT  | 467                 | (AT)9    | 55                    | 1st QTL analysis |
| Omo249      | JX204988    | 15            | CTGCCGACCCACTCCTCCAT      | GCGGCGAGCTCTGTGATGTTA     | 389                 | (CA)19   | 60                    | 1st QTL analysis |
| Omo379      | JX205085    | 15            | ATCCTCGCTGTCATCATCTCACTC  | GAAACCAGCTTCACTGATAACAAA  | 395                 | (GT)13   | 60                    | 1st QTL analysis |
| GM581       | BV005506.1  | 16            | CAAAGCAGCCACAAGTCAA       | ACCTATGTGGGCTGAATGCT      | 150                 | (CA)34   | 55                    | 1st QTL analysis |
| GM671       | BV005551.1  | 16            | CTCCGTGTGTGAGTGCAAGT      | CGAGGAGCGAGCAGAGTAAT      | 194                 | (GT)12   | 55                    | 1st QTL analysis |
| Omo023      | JX204849    | 16            | CCCTCCTACTTTAACCTCAC      | TTGTAATACCTGGACACCTC      | 395                 | (GT)10   | 55                    | 1st QTL analysis |
| Omo130      | JX204915    | 16            | CTTGCTCTAGGATGATCTTCTGTG  | TGAATGCAGCTGTGGTACAACCTCC | 140                 | (GT)11   | 55                    | 1st QTL analysis |
| Omo366      | JX205073    | 16            | TGCTATGCTTGCTCAACCTTAGAT  | ATGGCACTTGACAGAAACCTTTTA  | 271                 | (GT)20   | 60                    | 1st QTL analysis |
| Omo397      | GR693794.1  | 16            | ACGCGTGTGAGATATTTAGATT    | GAACAAACAAGGGGAGTGG       | 222                 | (GATT)7  | 60                    | 1st QTL analysis |
| Omo037      | JX204852    | 17            | GTCGGGCATATTCCAATTCTGTTA  | ACACTTCCTCCTGGGCTGTTCTAC  | 148                 | (GT)14   | 50                    | 1st QTL analysis |
| Omo330      | JX205047    | 17            | TCAGAAGCAGCTTGAAAAATCA    | TTTATTCCATGGTGAAAACATTCC  | 424                 | (GT)14   | 60                    | 1st QTL analysis |
| Omo382      | JX205088    | 17            | CCATCCGCAGCTTCATTTTCATAC  | AGCCAGAGCTGGAGGGACGATA    | 417                 | (CT)9    | 60                    | 1st QTL analysis |
| Omo179      | JX204937    | 18            | AACTGTTTTGGGTTTACGGAAGT   | GTTGAGGGGGAAGAGGAGGAGAG   | 350                 | (GT)23   | 55                    | 1st QTL analysis |
| Omo215      | JX204960    | 18            | AGTCGAGTGCAGCGAAAAAGTCA   | AGTTGGGGCTCTAATCTGTTCCCTC | 130                 | (AC)17   | 55                    | 1st QTL analysis |
| Omo327      | JX205045    | 18            | TTATTTTTCAAACCCAAACTCAGC  | CATGGGGTGTATCAGATGTGC     | 272                 | (GT)12   | 55                    | 1st QTL analysis |
| Omo340      | JX205053    | 18            | TTTTTCTCCAGTTGCCACAGC     | TTATTCCATTTCAAACCTTCGTCA  | 148                 | (GT)16   | 60                    | 1st QTL analysis |
| Omo426      | GR689482.1  | 18            | ATGCGTGGTTATTAGGTGTGGTAT  | TAATAGGATCGGTGACTTCAAACA  | 143                 | (AAGG)8  | 55                    | 1st QTL analysis |
| GM124       | BV005320.1  | 19            | GTATCTGGGCAGTCATTTTCT     | TCATATTCTGATGGAGTGGG      | 290                 | (CA)11   | 55                    | 1st QTL analysis |
| GM175       | BV005344.1  | 19            | GGGGCTGTAAGTGTCTGTATG     | GCAAACCTGACCAAATGACC      | 192                 | (CA)27   | 55                    | 1st QTL analysis |
| GM634       | BV005531.1  | 19            | CCCACATTAACCTTTCAGCA      | CTGAAACATGACTGCAGGAG      | 193                 | (GT)26   | 55                    | 1st QTL analysis |
| Omo021      | JX204848    | 19            | TCTACAGCAGTGCAGTAACATTCA  | AAAAACACGGCTATCAAACAGTTG  | 246                 | (AAGT)11 | 60                    | 1st QTL analysis |
| Omo197      | JX204951    | 19            | GTGGGCATCAGTACGATAAAAACC  | TTCTGTACAAACGATGCTGTGGAG  | 460                 | (AC)13   | 60                    | 1st QTL analysis |
| Omo281      | JX205008    | 19            | TCTTACCAGCTTGTATCTGTCACG  | AAGGCTTGAAGCACATGAGTGGAT  | 293                 | (GT)25   | 60                    | 1st QTL analysis |

Table S3 Primer information for microsatellite markers used in QTL mapping (Continued)

| Marker name | Genbank No. | Linkage group | Primer sequence (forward) | Primer sequence (reverse) | Product length (bp) | Motif     | Annealing temperature | Application      |
|-------------|-------------|---------------|---------------------------|---------------------------|---------------------|-----------|-----------------------|------------------|
| Omo310      | JX205032    | 19            | CAGTTAACTGGTAATTGCCTTTTG  | ATTCTGCGTTGGTTTCTACTTTTT  | 151                 | (GA)13    | 60                    | 1st QTL analysis |
| Omo336      | JX205051    | 19            | AGTGCCTGAGACACCAGTTTATCG  | CCTTCCCTGATCACTGCTACCATA  | 388                 | (TA)8     | 60                    | 1st QTL analysis |
| Omo010      | GR695213.1  | 20            | GTGGGTGCCATGGGATCTTGATA   | GGGCAAACCCCTTAAGTGGAGAG   | 198                 | (CA)14    | 55                    | 1st QTL analysis |
| Omo013      | JX204845    | 20            | CTGACACAGTCTCCCTGCGTATTA  | TAGGCATCCCTGGGCTAACTTC    | 144                 | (CTTT)15  | 50                    | 1st QTL analysis |
| Omo129      | JX204914    | 20            | TTGGCAGGCTAAGTACTATTTTCAT | GAGCGAATGGTTGTCTGTCTCT    | 267                 | (CCAT)9   | 55                    | 1st QTL analysis |
| Omo181      | JX204939    | 20            | TGTCTGTACACGTGTGGATGAGT   | TTCAAATTAACGTTTTCTGTTGGT  | 431                 | (GT)9     | 55                    | 1st QTL analysis |
| Omo227      | JX204971    | 20            | TTATGAGTGTGATGGCAGATGGAG  | CCTGGGTCATGACTGAAGTGAATA  | 260                 | (CA)9     | 55                    | 1st QTL analysis |
| Omo253      | JX204991    | 20            | GGGTGGCGATCACATACTTTTCTA  | CTCAAACAGTATGGTGGTGGATGG  | 243                 | (TA)8     | 55                    | 1st QTL analysis |
| Omo282      | JX205009    | 20            | AGAAGCCAAAGGAAAGGGAAAAT   | TTGGGGGTGACTCTTGAAAAGTAG  | 430                 | (GT)11    | 60                    | 1st QTL analysis |
| Omo288      | JX205013    | 20            | GTCCGGGCCCTGACTCTAAC      | GTCGTGCCAATGCTGTCACACTT   | 142                 | (GT)8     | 60                    | 1st QTL analysis |
| Omo360      | JX205068    | 20            | TGAATCCGGGCTAATTTACCTGTA  | GTATTATTGGCCAACAACGCACAC  | 374                 | (CA)23    | 60                    | 1st QTL analysis |
| Omo209      | JX204957    | 21            | GCGGCACTTCTTTACATCTTACGA  | AGGCGCAAAGCAGCATCAAA      | 247                 | (CA)27    | 55                    | 1st QTL analysis |
| Omo301      | JX205023    | 21            | AGCCATTCCTCATTGATTGTCGTG  | GGGGAGGGAGGGGGTTAGC       | 193                 | (CA)10    | 55                    | 1st QTL analysis |
| Omo367      | JX205074    | 21            | CAGGCCAGAAAACAGCAAAACC    | TGACCCTCATGTTTCAGTTCAAAGA | 346                 | (AAT)10(C | 60                    | 1st QTL analysis |
| Omo375      | JX205081    | 21            | TGGCTAAATTTAGAGCTCACTGTT  | GAAGGCAGGTAATCTAGCAAAAAG  | 367                 | (GT)11    | 60                    | 1st QTL analysis |
| Omo392      | GR698887.1  | 21            | CTGGCTTAACTTCTCTACTGGACA  | TCTACTCAAACCTGGCAACAAAAC  | 444                 | (GAATA)7  | 60                    | 1st QTL analysis |
| Omo395      | GR701233.1  | 21            | AGATGCCTGAGCTGGAAAAGAGAT  | TAAGCACCTGGATGGCATTATCAC  | 334                 | (CA)21    | 60                    | 1st QTL analysis |
| GM047       | BV005287.1  | 22            | TCTTGGGGACAGAAGTGTATT     | GTCGCAGGTAGACTGAAGG       | 189                 | (CA)23    | 55                    | 1st QTL analysis |
| GM163       | BV005338.1  | 22            | AGAATACAAGCGCCACACAT      | TATAGAGGGGTGAGGGGAGA      | 165                 | (CA)18    | 55                    | 1st QTL analysis |
| GM212       | BV005363.1  | 22            | CCTTCAGCTCACTGGGTCTC      | CATCCTTCATCATCCTCCCT      | 303                 | (CA)25    | 55                    | 1st QTL analysis |
| Omo012      | JX204844    | 22            | TATTCTGCCCTCACCTTGCTCAA   | CTCCCCCTCTTTTCAAGTTGTAGC  | 266                 | (TA)9     | 55                    | 1st QTL analysis |
| Omo038      | JX204853    | 22            | ATACGCAGGAAATCTTCAAACACC  | TTGCCCACTAGTGGTAAGAATCAA  | 351                 | (CAA)7    | 55                    | 1st QTL analysis |
| Omo049      | JX204860    | 22            | AGCCAGCGGAGACCAACAAAAT    | TCTCATGGGAGGCTCACTCACTCT  | 224                 | (GGAA)9   | 60                    | 1st QTL analysis |
| Omo106      | JX204901    | 22            | CCGTTAAAGGAGCAGTCCAC      | TTAGTGTTCATGCACAAATGAT    | 350                 | (CA)15    | 60                    | 1st QTL analysis |
| Omo107      | JX204902    | 22            | AGCCCAAACATCCCCTCTGTAA    | CATGGGGTTTTCTGTGACTCTTCCT | 434                 | (CA)10    | 60                    | 1st QTL analysis |
| Omo229      | JX204973    | 22            | GCGACTTTTTCTTTGCACATTTTT  | AACTGAACCGCCATCATAATCATC  | 159                 | (GTT)9    | 60                    | 1st QTL analysis |
| Omo244      | JX204984    | 22            | TTTGCGTGTCCCATCGTTTCTC    | CTCCACATGCCGCCACAGC       | 434                 | (CT)10    | 55                    | 1st QTL analysis |
| Omo433      | GR683132.1  | 22            | ATGTAGCGCTATCCACCTTCCATT  | AAAAAGAGGCAGGCGAGTTCATAC  | 284                 | (CA)18    | 60                    | 1st QTL analysis |

Table S4 Primers for amplification and expression analysis of GHR2, IGF-1 and IGF-2 genes

| Primers   | Sequences (5' - 3' )     | Applications                        | Lengths of products (bp) | Annealing temperature (°C) |
|-----------|--------------------------|-------------------------------------|--------------------------|----------------------------|
| GHR2-1F   | TCTAACGCTAACCCAGAAGGAA   | Amplification of exon 1 of GHR2     | 1296                     | 58                         |
| GHR2-1R   | AAAGCCAAACCAGCTCAGTAAG   |                                     |                          |                            |
| GHR2-2F   | TGCTGATACTCGCCTTG TG     | Amplification of exon 2 of GHR2     | 442                      | 55                         |
| GHR2-2R   | AACAGGCACCTATCACCCAT     |                                     |                          |                            |
| GHR2-3F   | TGAATCCTTTGGCTGTATGTG    | Amplification of exon 3 of GHR2     | 1043                     | 55                         |
| GHR2-3R   | CCCTGACCATGTAAGCAAGT     |                                     |                          |                            |
| GHR2-4F   | GACTAAAGGCTTGATGTCAGGTT  | Amplification of exon 4 of GHR2     | 870                      | 57                         |
| GHR2-4R   | TCGGCAGTGCTCATCTTGTA     |                                     |                          |                            |
| GHR2-5F   | TCAGCCCTCTGTAGGTTGATC    | Amplification of exon 5-7 of GHR2   | 1072                     | 56                         |
| GHR2-5R   | CGCCATTTGTGAGTACAAC TT A |                                     |                          |                            |
| GHR2-6F   | GTTGGTGAAATCACTCTACAGGTT | Amplification of exon 8 of GHR2     | 1356                     | 57                         |
| GHR2-6R   | GTCCTTGTTTGGCTTACAGCA    |                                     |                          |                            |
| GHR2-R1F  | TACAGCACTGAGACGCCAAACG   | Realtime analysis of GHR2           | 265                      | 60                         |
| GHR2-R1R  | GCTTCATCCACCCTGTCTCCAC   |                                     |                          |                            |
| Actin-R1F | TGACCCAGATCATGTTTCGAGAC  | Realtime analysis of $\beta$ -Actin | 254                      | 60                         |
| Actin-R1R | TGTGGTGGTGAAGGAGTAGCC    |                                     |                          |                            |
| IGF1-R1F  | CAGTGCGATGTGCTGTATCTCCT  | Realtime analysis of IGF-1          | 284                      | 60                         |
| IGF1-R1R  | TCTTGGGAGTCTTGACAGGTGC   |                                     |                          |                            |
| IGF2-R1F  | GCAGAACAGCAGAATGAAGGTC   | Realtime analysis of IGF-2          | 264                      | 60                         |
| IGF2-R1R  | TCCAGTAGGTTGAGGTCACAGC   |                                     |                          |                            |
